# Supplementary material
Source: MDPI journal article supplement (https://www.mdpi.com/2304-6740/11/7/283)
Supplement: s1 [file s1]

# Supporting Information

## Proton conduction properties of intrinsically sulfonated covalent organic framework composites

Jianjian Yang, Zhihui Kong, Xinyu Li, Qinglei Guo, Zhen Wang, Zixi Kang, Rongming Wang\* and Daofeng Sun

*State Key Laboratory of Heavy Oil Processing, School of Materials Science and Engineering, China University of Petroleum (East China), Qingdao 266580, China*

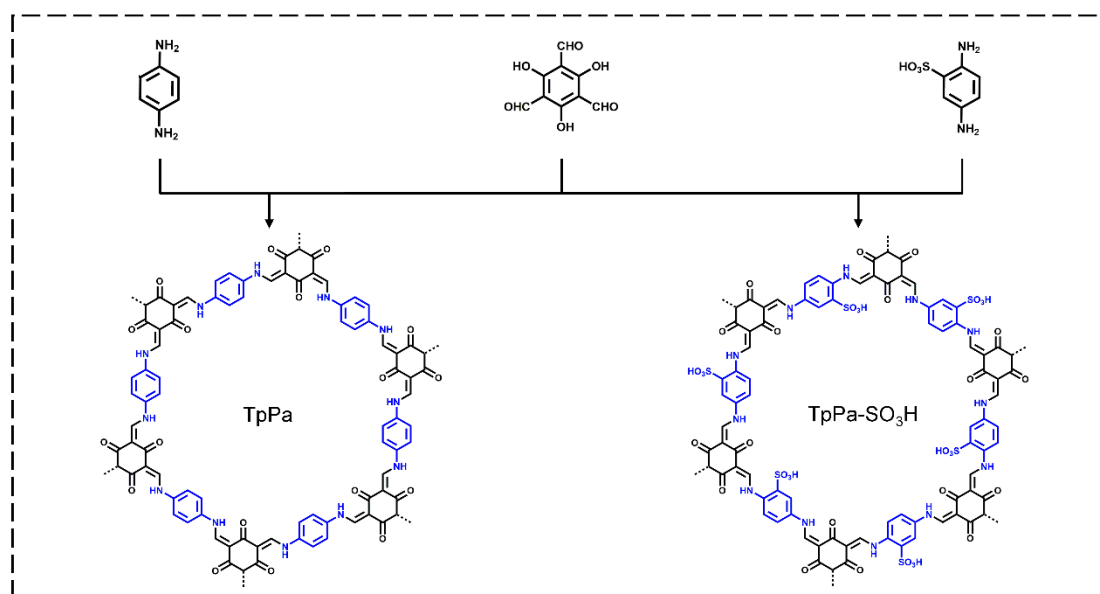

**Scheme S1.** Synthesis of TpPa and TpPa-SO<sub>3</sub>H.

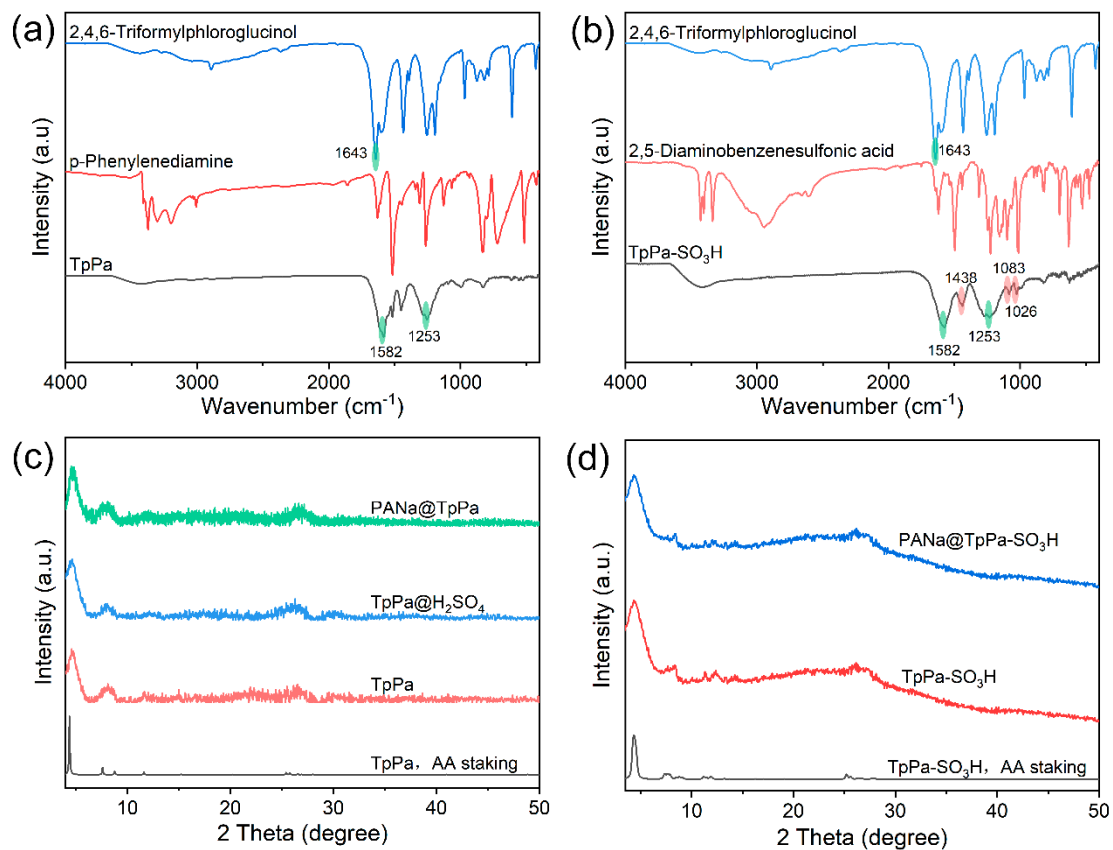

**Figure S1.** FT-IR spectra of (a) TpPa, p-phenylenediamine and 2,4,6-triformylphloroglucinol, (b) TpPa-SO<sub>3</sub>H, 2,5-diaminobenzenesulfonic acid and 2,4,6-triformylphloroglucinol, PXRD patterns of (c) TpPa, TpPa@H<sub>2</sub>SO<sub>4</sub> and PANA@TpPa (d) TpPa-SO<sub>3</sub>H and PANA@TpPa-SO<sub>3</sub>H.

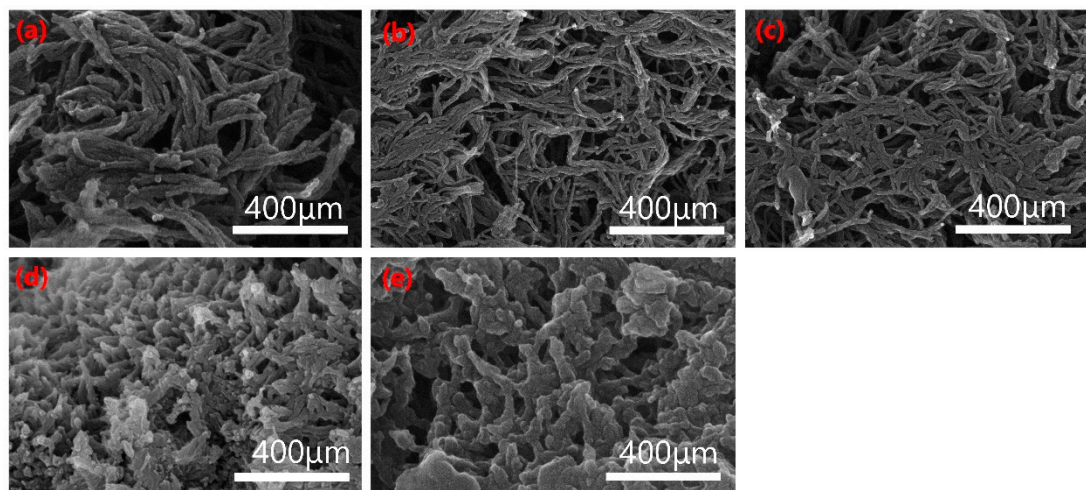

**Figure S2.** SEM image comparison of (a) TpPa, (b) TpPa@H<sub>2</sub>SO<sub>4</sub>, (c) TpPa-SO<sub>3</sub>H, (d) PANA@TpPa and (e) PANA@TpPa-SO<sub>3</sub>H.

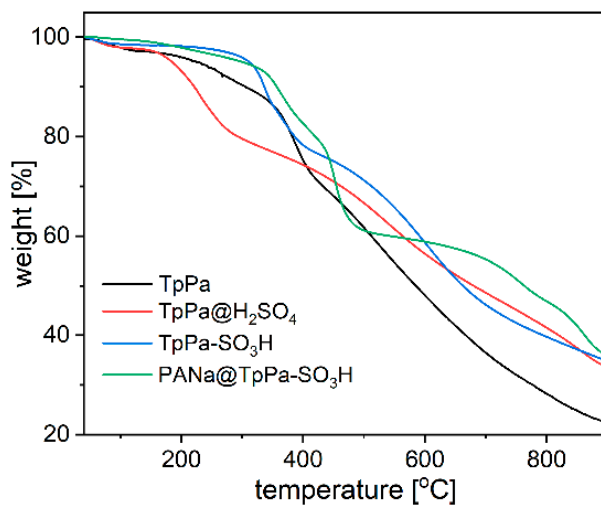

**Figure S3.** Thermal gravimetric analysis of TpPa, TpPa@H<sub>2</sub>SO<sub>4</sub>, TpPa-SO<sub>3</sub>H and PANA@TpPa-SO<sub>3</sub>H.

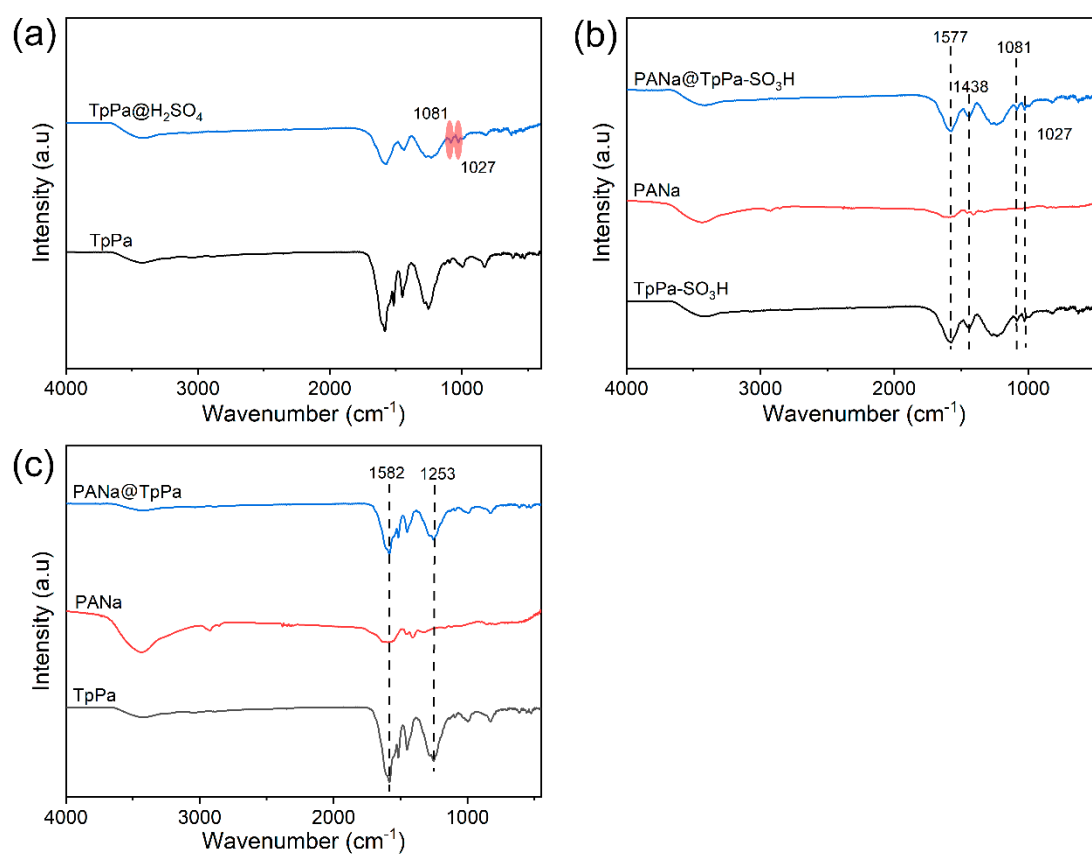

**Figure S4.** FT-IR spectra of (a) TpPa and TpPa@H<sub>2</sub>SO<sub>4</sub>; (b) TpPa-SO<sub>3</sub>H, PANA and PANA@TpPa-SO<sub>3</sub>H, (c) TpPa, PANA and PANA@TpPa.

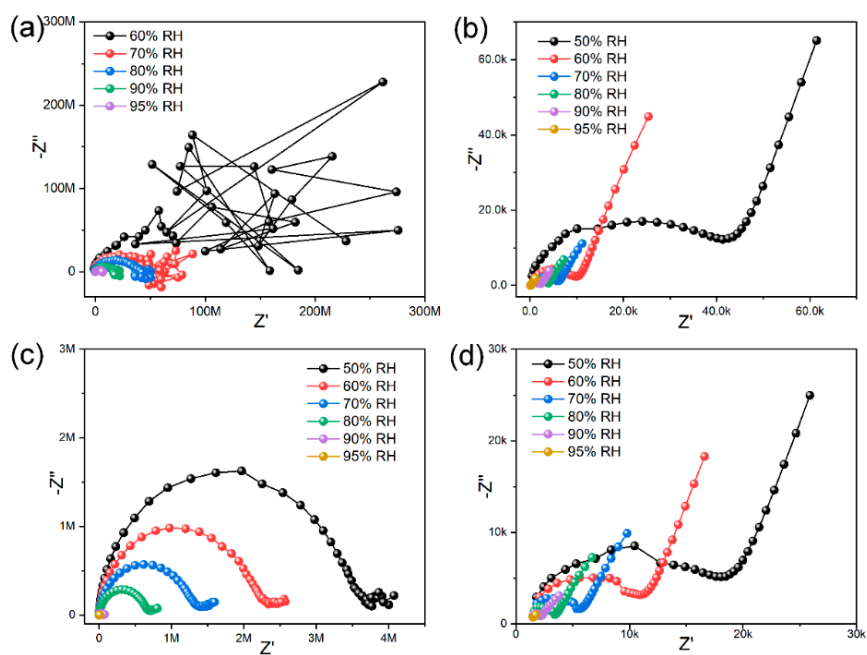

**Figure S5.** Humidity-dependent proton conductivities at 80 °C: Nyquist plots of (a) TpPa, (b) TpPa@H<sub>2</sub>SO<sub>4</sub>, (c) TpPa-SO<sub>3</sub>H and (d) PANa@TpPa-SO<sub>3</sub>H.

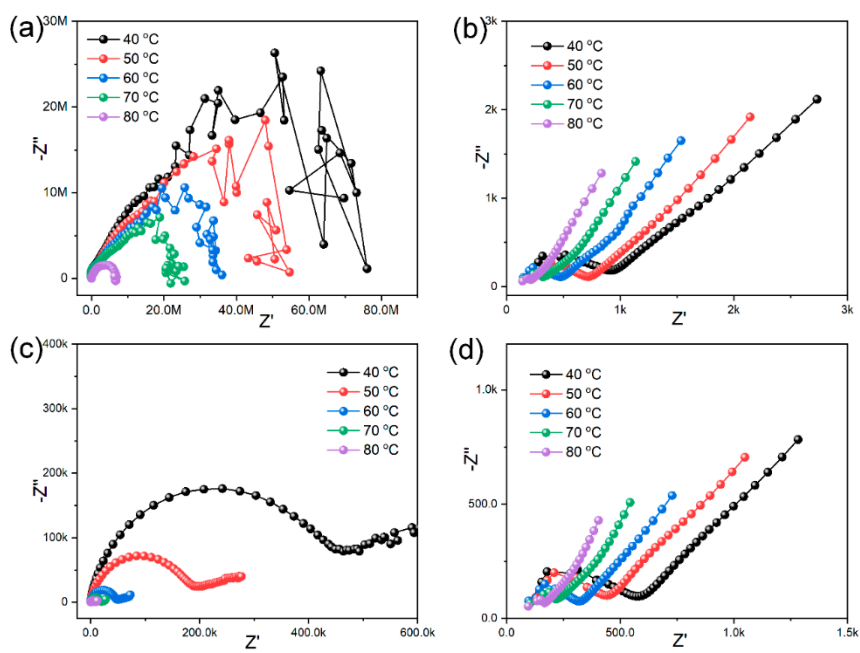

**Figure S6.** Temperature-dependent Nyquist plots of (a) TpPa, (b) TpPa@H<sub>2</sub>SO<sub>4</sub>, (c) TpPa-SO<sub>3</sub>H and (d) PANa@TpPa-SO<sub>3</sub>H.

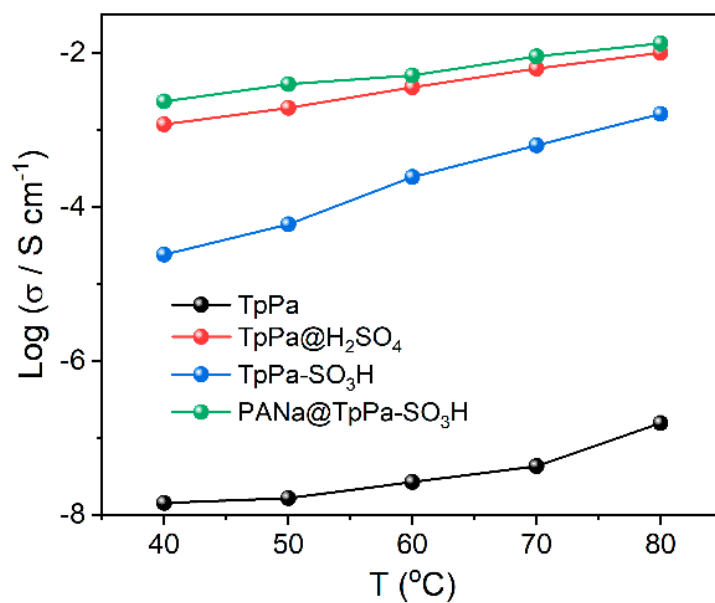

**Figure S7.** Temperature-dependent Log-scaled proton conductivities of TpPa, TpPa@H<sub>2</sub>SO<sub>4</sub>, TpPa-SO<sub>3</sub>H and PANA@TpPa-SO<sub>3</sub>H.

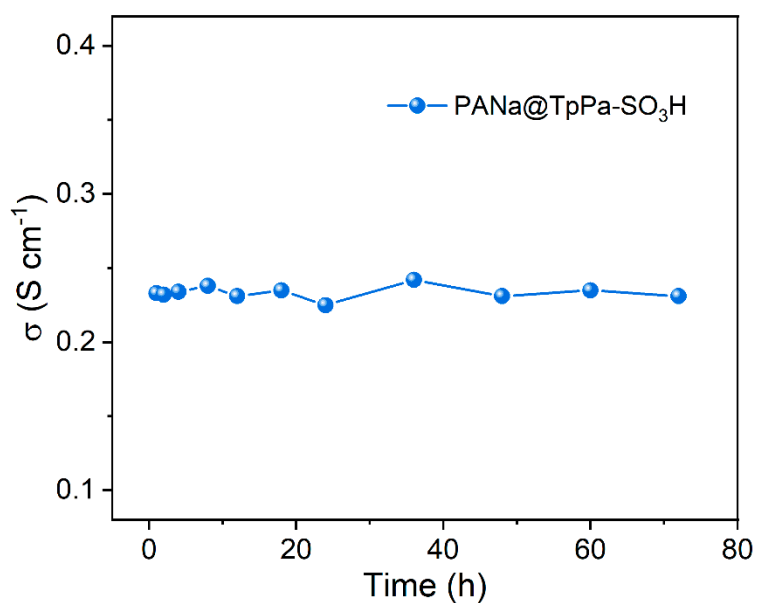

**Figure S8.** The time-dependent proton conductivities of PANA@TpPa-SO<sub>3</sub>H at 80 °C under 95% RH.

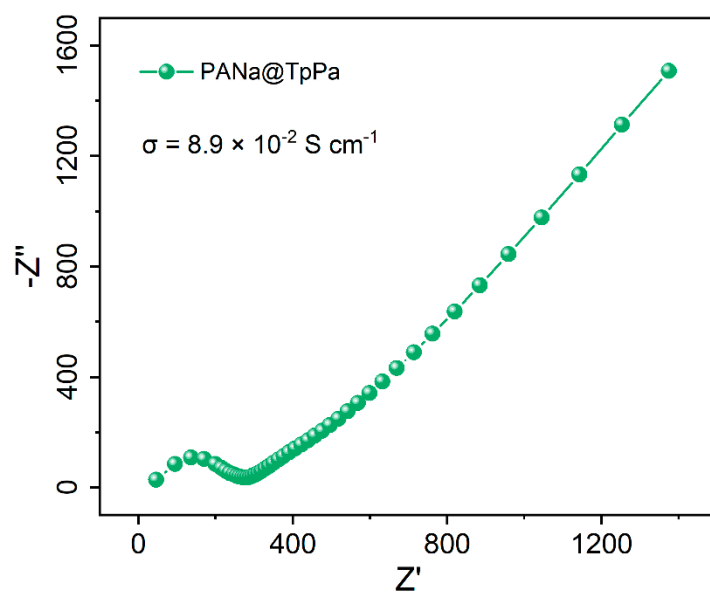

**Figure S9.** Nyquist plots of PANA@TpPa at 80 °C under 95% RH.

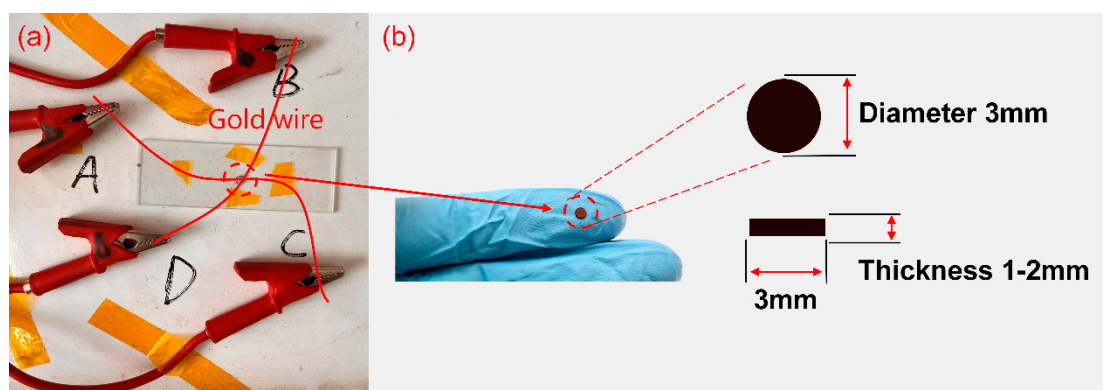

**Figure S10.** Proton conduction measurement diagram (a), diameter and thickness of sample particles (b).

**Table S1.** Comparison of proton conductivities in reported materials.

|    | Compound Name                                   | Conductivity<br>(S cm <sup>-1</sup> ) | Conditions        | References                              |
|----|-------------------------------------------------|---------------------------------------|-------------------|-----------------------------------------|
| 1  | SCOF[1]                                         | $5.40 \times 10^{-1}$                 | 80 °C, 100% RH    | <i>Angew. Chem. Int. Ed.</i> 2021       |
| 2  | IPC-COF[2]                                      | $3.80 \times 10^{-1}$                 | 80 °C, 35% RH     | <i>Adv. Mater.</i> 2020                 |
| 3  | PANa@TpPa-SO <sub>3</sub> H                     | $2.33 \times 10^{-1}$                 | 80 °C, 95% RH     | <b>This work</b>                        |
| 4  | H <sub>3</sub> PO <sub>4</sub> @NKCOF-1[3]      | $1.13 \times 10^{-1}$                 | 80 °C, 98% RH     | <i>Angew. Chem. Int. Ed.</i> 2020       |
| 5  | PIL <sub>0.5</sub> @m-TpPa-SO <sub>3</sub> H[4] | $1.02 \times 10^{-1}$                 | 90 °C, 100% RH    | <i>Adv. Funct. Mater.</i> 2023          |
| 6  | ZUT-COF-SO <sub>3</sub> H[5]                    | $8.65 \times 10^{-2}$                 | 80 °C, 98% RH     | <i>J. Mater. Chem. A</i> , 2023         |
| 7  | H <sub>3</sub> PO <sub>4</sub> @PyPz-COF[6]     | $8.10 \times 10^{-2}$                 | 80 °C, 98% RH     | <i>Small</i> 2023                       |
| 8  | H <sub>3</sub> PO <sub>4</sub> @NKCOF-10[7]     | $6.97 \times 10^{-2}$                 | 25 °C, 90% RH     | <i>Nat. Commun.</i> 2021                |
| 9  | im@XJCOF-1[8]                                   | $4.38 \times 10^{-2}$                 | 140 °C, Anhydrous | <i>ACS Nano</i> 2021                    |
| 10 | COF-F6-H[9]                                     | $4.20 \times 10^{-2}$                 | 140 °C, Anhydrous | <i>J. Am. Chem. Soc.</i> 2020           |
| 11 | PA@EB-COF[10]                                   | $2.77 \times 10^{-2}$                 | 180 °C, Anhydrous | <i>J. Mater. Chem. A</i> , 2020         |
| 12 | PCF-1-SO <sub>3</sub> H[11]                     | $2.60 \times 10^{-2}$                 | 30 °C, 95% RH     | <i>J. Mater. Chem. A</i> , 2017         |
| 13 | TpPa-SO <sub>3</sub> H                          | $1.62 \times 10^{-2}$                 | 80 °C, 95% RH     | <b>This work</b>                        |
| 14 | NUS-10@PVDF-50[12]                              | $1.58 \times 10^{-2}$                 | 80 °C, 97% RH     | <i>ACS Appl. Mater. Interfaces</i> 2016 |
| 15 | H@TPT-COF[13]                                   | $1.27 \times 10^{-2}$                 | 160 °C, anhydrous | <i>Angew. Chem. Int. Ed.</i> 2022       |
| 16 | CuCl <sub>2</sub> @TpTta-10[14]                 | $8.81 \times 10^{-3}$                 | 100 °C, 98% RH    | <i>ACS Appl. Mater. Interfaces</i> 2022 |
| 17 | aza-COF-2H[15]                                  | $4.80 \times 10^{-3}$                 | 50 °C, 97% RH     | <i>Chem. Mater.</i> 2018                |
| 18 | EB-COF: PW <sub>12</sub> [16]                   | $3.32 \times 10^{-3}$                 | 25 °C, 97% RH     | <i>J. Am. Chem. Soc.</i> 2016           |
| 19 | phytic@TpPa-(SO <sub>3</sub> H-Py)[17]          | $5.00 \times 10^{-4}$                 | 120 °C, Anhydrous | <i>Chem. Mater.</i> 2016                |
| 20 | TpPa                                            | $1.56 \times 10^{-7}$                 | 80 °C, 95% RH     | <b>This work</b>                        |

**Table S2.** Fractional atomic coordinates for the unit cell of TpPa.

| Space group |         | P6/M                                                                                           |     |
|-------------|---------|------------------------------------------------------------------------------------------------|-----|
| Unit cell   |         | $a = b = 23.3 \text{ \AA}, c = 3.5 \text{ \AA}, \alpha = \beta = 90^\circ, \gamma = 120^\circ$ |     |
| atoms       | x       | y                                                                                              | z   |
| C1          | 0.30486 | 0.71075                                                                                        | 0.5 |
| C2          | 0.25918 | 0.63762                                                                                        | 0.5 |
| C3          | 0.38469 | 0.57717                                                                                        | 0.5 |
| N4          | 0.45324 | 0.59306                                                                                        | 0.5 |
| C5          | 0.47517 | 0.54499                                                                                        | 0.5 |
| C6          | 0.54348 | 0.56834                                                                                        | 0.5 |
| C7          | 0.57022 | 0.5251                                                                                         | 0.5 |
| O8          | 0.46591 | 0.71976                                                                                        | 0.5 |
| H9          | 0.57779 | 0.62123                                                                                        | 0.5 |
| H10         | 0.50883 | 0.35776                                                                                        | 0.5 |
| H11         | 0.65263 | 0.47464                                                                                        | 0.5 |
| H12         | 0.3753  | 0.45244                                                                                        | 0.5 |

**Table S3.** Fractional atomic coordinates for the unit cell of TpPa-SO<sub>3</sub>H.

| Space group |         | P1                                                                                             |          |
|-------------|---------|------------------------------------------------------------------------------------------------|----------|
| Unit cell   |         | $a = b = 23.3 \text{ \AA}, c = 3.8 \text{ \AA}, \alpha = \beta = 90^\circ, \gamma = 120^\circ$ |          |
| atoms       | x       | y                                                                                              | z        |
| O1          | 1.27851 | 0.52156                                                                                        | 0.88261  |
| O2          | 1.34551 | 0.52156                                                                                        | 0.9924   |
| O3          | 1.30686 | 0.52156                                                                                        | 0.84134  |
| O4          | 0.59901 | 0.52156                                                                                        | 0.66582  |
| O5          | 0.60073 | 0.52156                                                                                        | 0.58066  |
| O6          | 0.49914 | 0.52156                                                                                        | 0.65039  |
| O7          | 1.11957 | 0.52156                                                                                        | 1.33211  |
| O8          | 1.14524 | 0.52156                                                                                        | 1.42818  |
| O9          | 1.02138 | 0.52156                                                                                        | 1.281    |
| H10         | 0.63363 | 0.52156                                                                                        | 0.66113  |
| H11         | 1.1671  | 0.52156                                                                                        | 1.37102  |
| H12         | 1.26255 | 0.52156                                                                                        | 0.83385  |
| H13         | 1.40081 | 0.50702                                                                                        | 1.32267  |
| H14         | 0.93982 | 0.49899                                                                                        | 0.51874  |
| H15         | 0.62153 | 0.49238                                                                                        | 1.05159  |
| C16         | 0.71791 | 0.5                                                                                            | -0.71063 |
| C17         | 0.64679 | 0.5                                                                                            | -0.75033 |
| C18         | 0.60698 | 0.5                                                                                            | -0.7133  |
| C19         | 0.63669 | 0.5                                                                                            | -0.6387  |



|     |         |     |          |
|-----|---------|-----|----------|
| C20 | 0.70822 | 0.5 | -0.60216 |
| C21 | 0.75028 | 0.5 | -0.63635 |
| C22 | 0.60317 | 0.5 | -0.60132 |
| N23 | 0.53377 | 0.5 | -0.62712 |
| C24 | 0.49712 | 0.5 | -0.58876 |
| C25 | 0.52834 | 0.5 | -0.51851 |
| C26 | 0.49381 | 0.5 | -0.48047 |
| C27 | 0.42535 | 0.5 | -0.51306 |
| C28 | 0.39472 | 0.5 | -0.58268 |
| C29 | 0.42821 | 0.5 | -0.62069 |
| N30 | 0.3838  | 0.5 | -0.48008 |
| C31 | 0.4028  | 0.5 | -0.40905 |
| C32 | 0.36166 | 0.5 | -0.37992 |
| C33 | 0.28981 | 0.5 | -0.4171  |
| C34 | 0.2478  | 0.5 | -0.38233 |
| C35 | 0.28014 | 0.5 | -0.30843 |
| C36 | 0.35123 | 0.5 | -0.26861 |
| C37 | 0.39089 | 0.5 | -0.30585 |
| S38 | 0.5279  | 0.5 | -0.41114 |
| O39 | 0.73355 | 0.5 | -0.54145 |
| O40 | 0.74981 | 0.5 | -0.74118 |
| O41 | 0.54913 | 0.5 | -0.74474 |
| O42 | 0.44915 | 0.5 | -0.27582 |
| O43 | 0.24684 | 0.5 | -0.27902 |
| C44 | 0.81564 | 0.5 | -0.59753 |
| N45 | 0.86388 | 0.5 | -0.62212 |
| C46 | 0.62285 | 0.5 | -0.8185  |
| N47 | 0.5554  | 0.5 | -0.8664  |
| C48 | 0.37504 | 0.5 | -0.20065 |
| N49 | 0.4425  | 0.5 | -0.15306 |
| C50 | 0.18168 | 0.5 | -0.41325 |
| N51 | 0.14092 | 0.5 | -0.48453 |
| O52 | 0.26497 | 0.5 | -0.47716 |
| C53 | 0.93342 | 0.5 | -0.58345 |
| C54 | 0.46859 | 0.5 | -0.08084 |
| C55 | 0.07096 | 0.5 | -0.51801 |
| C56 | 0.43125 | 0.5 | -0.04466 |
| C57 | 0.53582 | 0.5 | -0.04447 |
| C58 | 0.03484 | 0.5 | -0.48135 |
| C59 | 0.03617 | 0.5 | -0.58915 |
| C60 | 0.96717 | 0.5 | -0.51273 |
| C61 | 0.96949 | 0.5 | -0.61949 |
| C62 | 0.52938 | 0.5 | -0.93861 |

|     |         |     |          |
|-----|---------|-----|----------|
| C63 | 0.46215 | 0.5 | -0.97498 |
| C64 | 0.56672 | 0.5 | -0.97476 |
| S65 | 0.36411 | 0.5 | -0.07652 |
| S66 | 0.06366 | 0.5 | -0.63351 |
| H67 | 0.63143 | 0.5 | -0.54794 |
| H68 | 0.5068  | 0.5 | -0.6778  |
| H69 | 0.57984 | 0.5 | -0.4917  |
| H70 | 0.34278 | 0.5 | -0.60934 |
| H71 | 0.33542 | 0.5 | -0.51334 |
| H72 | 0.45371 | 0.5 | -0.3756  |
| H73 | 0.83178 | 0.5 | -0.54427 |
| H74 | 0.84921 | 0.5 | -0.67308 |
| H75 | 0.65821 | 0.5 | -0.83751 |
| H76 | 0.52029 | 0.5 | -0.84973 |
| H77 | 0.33953 | 0.5 | -0.18179 |
| H78 | 0.47731 | 0.5 | -0.17022 |
| H79 | 0.15825 | 0.5 | -0.38113 |
| H80 | 0.16284 | 0.5 | -0.51544 |
| H81 | 0.56506 | 0.5 | -0.07084 |
| H82 | 0.05802 | 0.5 | -0.42791 |
| H83 | 0.94571 | 0.5 | -0.67336 |
| H84 | 0.4329  | 0.5 | -0.94863 |

**Table S4.** Humidity-dependent proton conductivity ( $\text{S cm}^{-1}$ ) of TpPa, TpPa@H<sub>2</sub>SO<sub>4</sub>, TpPa-SO<sub>3</sub>H and PANa@TpPa-SO<sub>3</sub>H.

| Conditions  | TpPa                  | TpPa@H <sub>2</sub> SO <sub>4</sub> | TpPa-SO <sub>3</sub> H | PANa@TpPa-SO <sub>3</sub> H |
|-------------|-----------------------|-------------------------------------|------------------------|-----------------------------|
| 80°C, 50%RH |                       | $2.68 \times 10^{-4}$               | $3.65 \times 10^{-5}$  | $6.46 \times 10^{-4}$       |
| 80°C, 60%RH | $5.44 \times 10^{-9}$ | $1.02 \times 10^{-3}$               | $4.92 \times 10^{-5}$  | $1.28 \times 10^{-3}$       |
| 80°C, 70%RH | $1.84 \times 10^{-8}$ | $2.69 \times 10^{-3}$               | $8.14 \times 10^{-5}$  | $2.86 \times 10^{-3}$       |
| 80°C, 80%RH | $2.74 \times 10^{-8}$ | $5.38 \times 10^{-3}$               | $1.59 \times 10^{-4}$  | $5.81 \times 10^{-3}$       |
| 80°C, 90%RH | $5.54 \times 10^{-8}$ | $1.39 \times 10^{-2}$               | $2.06 \times 10^{-3}$  | $7.54 \times 10^{-2}$       |
| 80°C, 95%RH | $1.56 \times 10^{-7}$ | $1.33 \times 10^{-1}$               | $1.62 \times 10^{-2}$  | $2.33 \times 10^{-1}$       |

**Table S5.** Temperature-dependent proton conductivity ( $\text{S cm}^{-1}$ ) of TpPa, TpPa@H<sub>2</sub>SO<sub>4</sub>, TpPa-SO<sub>3</sub>H and PANA@TpPa-SO<sub>3</sub>H.

| Conditions  | TpPa                  | TpPa@H <sub>2</sub> SO <sub>4</sub> | TpPa-SO <sub>3</sub> H | PANA@TpPa-SO <sub>3</sub> H |
|-------------|-----------------------|-------------------------------------|------------------------|-----------------------------|
| 40°C, 95%RH | $1.43 \times 10^{-8}$ | $1.55 \times 10^{-2}$               | $2.41 \times 10^{-4}$  | $2.35 \times 10^{-2}$       |
| 50°C, 95%RH | $1.65 \times 10^{-8}$ | $2.53 \times 10^{-2}$               | $5.95 \times 10^{-4}$  | $3.95 \times 10^{-2}$       |
| 60°C, 95%RH | $2.68 \times 10^{-8}$ | $4.71 \times 10^{-2}$               | $2.46 \times 10^{-3}$  | $5.14 \times 10^{-2}$       |
| 70°C, 95%RH | $4.30 \times 10^{-8}$ | $8.26 \times 10^{-2}$               | $6.32 \times 10^{-3}$  | $9.05 \times 10^{-2}$       |
| 80°C, 95%RH | $1.56 \times 10^{-7}$ | $1.33 \times 10^{-1}$               | $1.62 \times 10^{-2}$  | $2.33 \times 10^{-1}$       |

## References

1. Liu, L.; Yin, L.; Cheng, D.; Zhao, S.; Zang, H.Y.; Zhang, N.; Zhu, G. Surface-Mediated Construction of an Ultrathin Free-Standing Covalent Organic Framework Membrane for Efficient Proton Conduction. *Angew. Chem. Int. Ed.* **2021**, *60*, 14875-14880.
2. Cao, L.; Wu, H.; Cao, Y.; Fan, C.; Zhao, R.; He, X.; Yang, P.; Shi, B.; You, X.; Jiang, Z. Weakly Humidity-Dependent Proton-Conducting COF Membranes. *Adv. Mater.* **2020**, *32*, 2005565.
3. Yang, Y.; He, X.; Zhang, P.; Andaloussi, Y.H.; Zhang, H.; Jiang, Z.; Chen, Y.; Ma, S.; Cheng, P.; Zhang, Z. Combined Intrinsic and Extrinsic Proton Conduction in Robust Covalent Organic Frameworks for Hydrogen Fuel Cell Applications. *Angew. Chem. Int. Ed.* **2020**, *59*, 3678-3684.
4. Zou, W.; Jiang, G.; Zhang, W.; Zhang, L.; Cui, Z.; Song, H.; Liang, Z.; Du, L. Hierarchically Macro-Microporous Covalent Organic Frameworks for Efficient Proton Conduction. *Adv. Funct. Mater.* **2023**, *15*, 2213642.
5. Shao, Z.; Xue, X.; Gao, K.; Chen, J.; Zhai, L.; Wen, T.; Xiong, S.; Hou, H.; Mi, L. Sulfonated Covalent Organic Framework Packed Nafion Membrane with High Proton Conductivity for H<sub>2</sub>/O<sub>2</sub> Fuel Cell Applications. *J. Mater. Chem. A* **2023**, *11*, 3446-3453.
6. Wang, F.D.; Yang, L.J.; Wang, X.X.; Rong, Y.; Yang, L.B.; Zhang, C.X.; Yan, F.Y.; Wang, Q.L. Pyrazine-Functionalized Donor-Acceptor Covalent Organic Frameworks for Enhanced Photocatalytic H<sub>2</sub> Evolution with High Proton Transport. *Small* **2023**, *18*, 2207421.
7. Wang, Z.; Yang, Y.; Zhao, Z.; Zhang, P.; Zhang, Y.; Liu, J.; Ma, S.; Cheng, P.; Chen, Y.; Zhang, Z. Green Synthesis of Olefin-Linked Covalent Organic Frameworks for Hydrogen Fuel Cell Applications. *Nat. Commun.* **2021**, *12*, 1982.
8. Fu, Y.; Wu, Y.; Chen, S.; Zhang, W.; Zhang, Y.; Yan, T.; Yang, B.; Ma, H. Zwitterionic Covalent Organic Frameworks: Attractive Porous Host for Gas Separation and Anhydrous Proton Conduction. *ACS Nano* **2021**, *15*, 19743-19755.

9. Wu, X.; Hong, Y.L.; Xu, B.; Nishiyama, Y.; Jiang, W.; Zhu, J.; Zhang, G.; Kitagawa, S.; Horike, S. Perfluoroalkyl-Functionalized Covalent Organic Frameworks with Superhydrophobicity for Anhydrous Proton Conduction. *J. Am. Chem. Soc.* **2020**, *142*, 14357-14364.
10. Chen, S.; Wu, Y.; Zhang, Y.; Zhang, W.; Fu, Y.; Huang, W.; Yan, T.; Ma, H. Tuning Proton Dissociation Energy in Proton Carrier Doped 2D Covalent Organic Frameworks for Anhydrous Proton Conduction at Elevated Temperature. *J. Mater. Chem. A* **2020**, *8*, 13702-13709.
11. Samanta, P.; Desai, A.V.; Anothumakkool, B.; Shirolkar, M.M.; Karmakar, A.; Kurungot, S.; Ghosh, S.K. Enhanced Proton Conduction by Post-Synthetic Covalent Modification in a Porous Covalent Framework. *J. Mater. Chem. A* **2017**, *5*, 13659-13664.
12. Peng, Y.; Xu, G.; Hu, Z.; Cheng, Y.; Chi, C.; Yuan, D.; Cheng, H.; Zhao, D. Mechanoassisted Synthesis of Sulfonated Covalent Organic Frameworks with High Intrinsic Proton Conductivity. *ACS Appl. Mater. Interfaces* **2016**, *8*, 18505-18512.
13. Jiang, G.; Zou, W.; Ou, Z.; Zhang, L.; Zhang, W.; Wang, X.; Song, H.; Cui, Z.; Liang, Z.; Du, L. Tuning the Interlayer Interactions of 2D Covalent Organic Frameworks Enables an Ultrastable Platform for Anhydrous Proton Transport. *Angew. Chem. Int. Ed.* **2022**, *61*, 202208086.
14. Guo, Z.C.; You, M.L.; Wang, Z.J.; Li, Z.F.; Li, G. Metal@Cofs Possess High Proton Conductivity with Mixed Conducting Mechanisms. *ACS Appl. Mater. Interfaces* **2022**, *14*, 15687-15676.
15. Meng, Z.; Aykanat, A.; Mirica, K.A. Proton Conduction in 2D Aza-Fused Covalent Organic Frameworks. *Chem. Mater.* **2018**, *31*, 819-825.
16. Ma, H.; Liu, B.; Li, B.; Zhang, L.; Li, Y.G.; Tan, H.Q.; Zang, H.Y.; Zhu, G. Cationic Covalent Organic Frameworks: A Simple Platform of Anionic Exchange for Porosity Tuning and Proton Conduction. *J. Am. Chem. Soc.* **2016**, *138*, 5897-5903.
17. Chandra, S.; Kundu, T.; Dey, K.; Addicoat, M.; Heine, T.; Banerjee, R. Interplaying Intrinsic and Extrinsic Proton Conductivities in Covalent Organic Frameworks. *Chem. Mater.* **2016**, *28*, 1489-1494.
